# Supplementary material for: Strain-engineered BlueP–MoS2 van der Waals heterostructure with improved lithiation/sodiation for LIBs and SIBs
Source: Royal Society of Chemistry journal article supplement (doi:10.1039/c9cp04349g), 2019-12-20
Supplement: c9cp04349g1.pdf [file c9cp04349g1.pdf]

## Supporting Information

### Strain Engineered Blue P-MoS<sub>2</sub> van der Waals Heterostructure with Improved Lithiation/Sodiation for LIBs and SIBs

Gayatree Barik,<sup>1</sup> and Sourav Pal<sup>1,2\*</sup>

<sup>1</sup>Department of Chemistry, Indian Institute of Technology Bombay, Mumbai 400076, India

<sup>2</sup>Department of Chemical Sciences, Indian Institute of Science Education and Research Kolkata, Mohanpur, 741246, India

Email: s.pal@iiserkol.ac.in

**Fig. S1** Schematic views of the charge density difference of single Li (top line) and Na (bottom line) adsorption on unstrained Blue P-MoS<sub>2</sub> heterostructure. Adsorption on the out-surface of MoS<sub>2</sub> (left); Adsorption at the interlayer of Blue P and MoS<sub>2</sub> (middle) and Adsorption on the out-surface of phosphorene (right). The loss of electrons is indicated in pink and gain of electrons is indicated in blue colour.

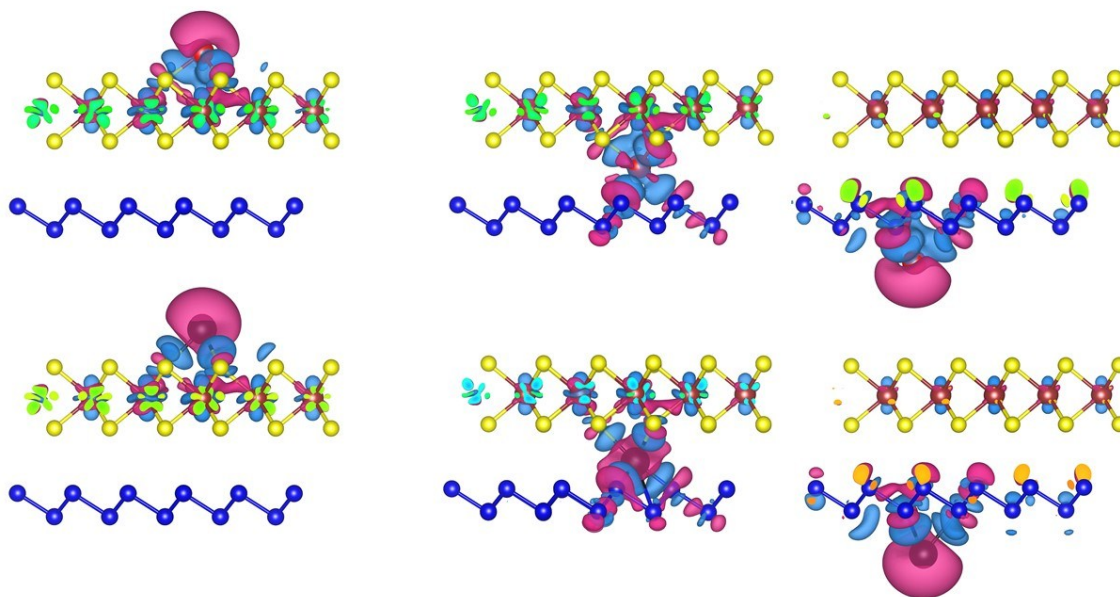

**Fig. S2** Schematic views of the charge density difference of single Li (top line) and Na (bottom line) adsorption on Blue P-MoS<sub>2</sub> heterostructure at 10% Tensile strain. Adsorption on the out-surface of MoS<sub>2</sub> (left); Adsorption at the interlayer of Blue P and MoS<sub>2</sub> (middle) and Adsorption on the out-surface of phosphorene (right). The loss of electrons is indicated in pink and gain of electrons is indicated in blue colour.

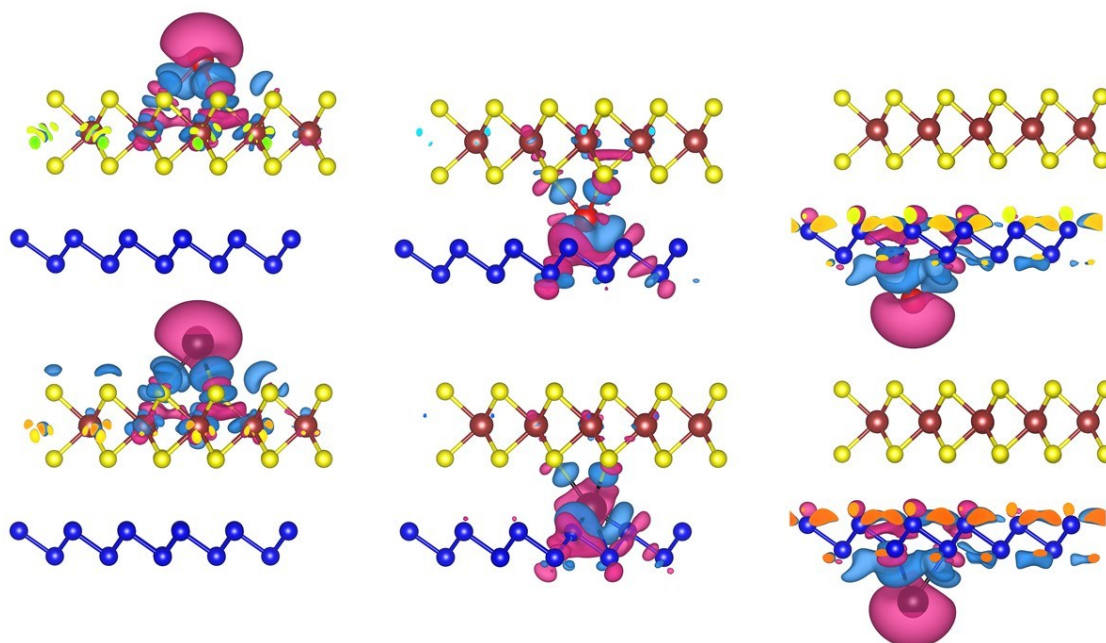

**Fig. S3** Schematic views of the charge density difference of single Li (top line) and Na (bottom line) adsorption on Blue P-MoS<sub>2</sub> heterostructure at 10% compressive strain. Adsorption on the out-surface of MoS<sub>2</sub> (left); Adsorption at the interlayer of Blue P and MoS<sub>2</sub> (middle) and Adsorption on the out-surface of phosphorene (right). The loss of electrons is indicated in pink and gain of electrons is indicated in blue colour.

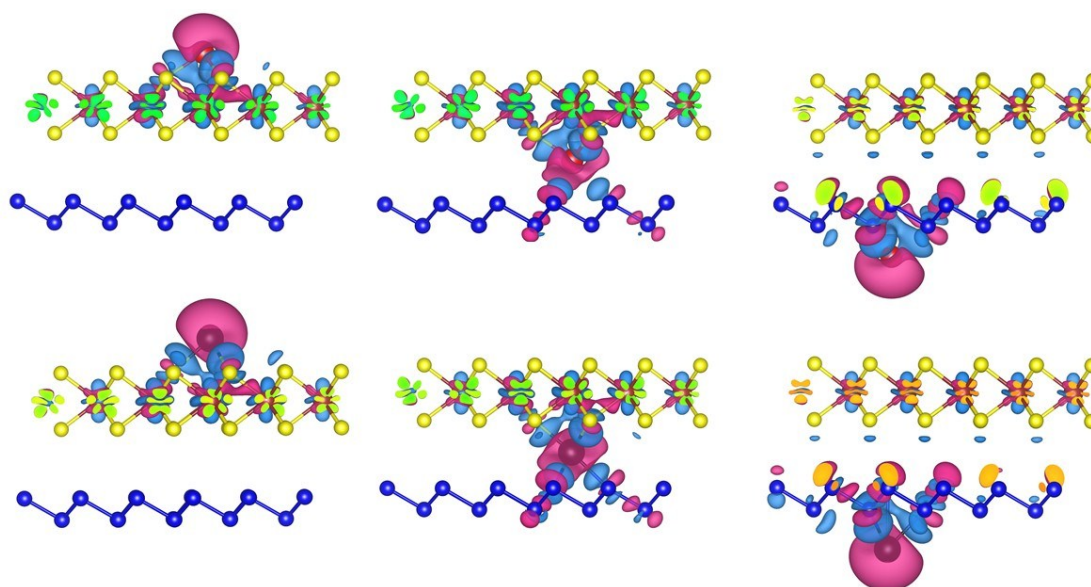

**Table S1.** Energy difference  $\Delta E_i$  (meV) and interlayer distance  $d$  (Å), between various configurations obtained by subtracting the total energy of most stable configuration in Blue P-MoS<sub>2</sub> vdW heterostructures.

| Rotation angle ( $^{\circ}$ ) | $\Delta E_i$ (meV) | Inter layer distance $d$ ( $\text{\AA}$ ) |
|-------------------------------|--------------------|-------------------------------------------|
| 0                             | 0.00               | 3.9                                       |
| 60                            | 2.45               | 3.78                                      |
| 120                           | 32.81              | 3.45                                      |
| 180                           | 34.85              | 3.45                                      |
| 240                           | 48.86              | 3.47                                      |
| 300                           | 20.64              | 3.77                                      |

**Table S2.** Interatomic distance in unstrained Blue P-MoS<sub>2</sub> van der Waals heterostructure, by the application of 10% compressive strain, 10% tensile strain.

| Strain                             | $D_{Mo-Mo}$ in $\text{\AA}$<br>(In-plane) | $D_{S-S}$ in $\text{\AA}$<br>(Height) | $D_{P-P}$ in $\text{\AA}$<br>(In-plane) | $D_{P-P}$ in $\text{\AA}$<br>(Height) | Interlayer distance in $\text{\AA}$ | Total thickness in $\text{\AA}$ |
|------------------------------------|-------------------------------------------|---------------------------------------|-----------------------------------------|---------------------------------------|-------------------------------------|---------------------------------|
| Unstrained Blue P-MoS <sub>2</sub> | 3.28                                      | 3.18                                  | 2.27                                    | 1.25                                  | 3.45                                | 7.88                            |
| Compressed (10%)                   | 2.95                                      | 3.43                                  | 2.15                                    | 1.32                                  | 3.63                                | 8.38                            |
| Stretched (10%)                    | 3.60                                      | 3.01                                  | 2.40                                    | 1.20                                  | 3.13                                | 7.38                            |

**Table S3:** Change in structural properties obtained by the application of strain on Blue P-MoS<sub>2</sub> vdW heterostructure.

| % of strain | $E_{form}$ in eV | IL distance ( $\text{\AA}$ ) | $\theta_{P-P-P}$ ( $^{\circ}$ ) | $D_{P-P}$ ( $\text{\AA}$ ) | $\theta_{P-P-P}$ ( $^{\circ}$ ) | $D_{Mo-S}$ ( $\text{\AA}$ ) |
|-------------|------------------|------------------------------|---------------------------------|----------------------------|---------------------------------|-----------------------------|
| -10         | -0.589           | 3.63                         | 86.31                           | 2.15                       | 75.23                           | 2.41                        |
| -8          | -0.477           | 3.65                         | 87.53                           | 2.17                       | 76.76                           | 2.42                        |
| -6          | -0.371           | 3.68                         | 88.91                           | 2.20                       | 78.48                           | 2.43                        |
| -4          | -0.295           | 3.72                         | 90.20                           | 2.22                       | 80.09                           | 2.45                        |
| -2          | -0.217           | 3.74                         | 91.35                           | 2.25                       | 81.54                           | 2.46                        |

|    |        |      |       |      |       |      |
|----|--------|------|-------|------|-------|------|
| 0  | -0.154 | 3.45 | 92.48 | 2.27 | 83.01 | 2.47 |
| 2  | -0.093 | 3.39 | 93.53 | 2.30 | 84.33 | 2.49 |
| 4  | -0.039 | 3.34 | 94.50 | 2.32 | 85.60 | 2.51 |
| 6  | 0.015  | 3.30 | 95.47 | 2.35 | 86.83 | 2.53 |
| 8  | 0.053  | 3.23 | 96.25 | 2.38 | 87.89 | 2.55 |
| 10 | 0.084  | 3.16 | 97.02 | 2.40 | 89.07 | 2.56 |

**Table S4: (a)** Strain-induced Li/Na adsorption properties of Blue P-MoS<sub>2</sub> heterostructure when Li/Na adsorption takes place at the interface. Li adsorption energy ( $E_{ad}$  (Li)), Na adsorption energy ( $E_{ad}$  (Na)), and Bond Lengths between Li-Mo ( $D_{Li-Mo}$ ), Na-Mo ( $D_{Na-Mo}$ ), charge transfer from Li, q (|e|) Li and charge transfer from Na, q (|e|) Na.

| % of strain | $E_{ad}$ (Li) in eV | $D_{Li-Mo}$ (Å) | q ( e ) Li | $E_{ad}$ (Na) in eV | $D_{Na-Mo}$ (Å) | q ( e ) Na |
|-------------|---------------------|-----------------|------------|---------------------|-----------------|------------|
| -10         | -2.71               | 3.62            | 0.882      | -1.69               | 3.90            | 0.829      |
| -8          | -2.52               | 3.50            | 0.881      | -1.48               | 3.83            | 0.827      |
| -6          | -2.42               | 3.41            | 0.884      | -1.37               | 3.75            | 0.822      |
| -4          | -2.37               | 3.33            | 0.880      | -1.32               | 3.70            | 0.818      |
| -2          | -2.40               | 3.30            | 0.882      | -1.35               | 3.65            | 0.813      |
| 0           | -2.51               | 3.26            | 0.822      | -1.46               | 3.56            | 0.813      |
| 2           | -2.70               | 3.16            | 0.884      | -1.63               | 3.46            | 0.810      |
| 4           | -2.89               | 3.09            | 0.883      | -1.84               | 3.42            | 0.811      |
| 6           | -3.09               | 3.04            | 0.884      | -2.03               | 3.39            | 0.813      |
| 8           | -3.25               | 3.00            | 0.883      | -2.17               | 3.37            | 0.815      |
| 10          | -3.36               | 2.99            | 0.883      | -2.27               | 3.35            | 0.819      |

**Table S4: (b)** Strain-induced Li/Na adsorption properties of Blue P-MoS<sub>2</sub> heterostructure when Li/Na adsorption takes place on the surface of MoS<sub>2</sub>. Li adsorption energy ( $E_{ad}$ (Li)), Na

adsorption energy ( $E_{ad}(\text{Na})$ ), and Bond Lengths between Li-Mo ( $D_{\text{Li-Mo}}$ ), Na-Mo ( $D_{\text{Na-Mo}}$ ), charge transfer from Li,  $q$  (|e|) Li and charge transfer from Na,  $q$  (|e|) Na.

| % of strain | $E_{ad}$ (Li) in eV | $D_{\text{Li-Mo}}$ (Å) | Q ( e ) Li | $E_{ad}$ (Na) in eV | $D_{\text{Na-Mo}}$ (Å) | Q ( e ) Na |
|-------------|---------------------|------------------------|------------|---------------------|------------------------|------------|
| -10         | -2.17               | 3.38                   | 0.899      | -1.31               | 3.89                   | 0.823      |
| -8          | -2.12               | 3.31                   | 0.896      | -1.28               | 3.87                   | 0.806      |
| -6          | -2.09               | 3.27                   | 0.896      | -1.27               | 3.84                   | 0.791      |
| -4          | -2.09               | 3.23                   | 0.896      | -1.29               | 3.80                   | 0.782      |
| -2          | -2.12               | 3.16                   | 0.895      | -1.33               | 3.76                   | 0.778      |
| 0           | -2.28               | 3.09                   | 0.899      | -1.42               | 3.60                   | 0.857      |
| 2           | -2.54               | 3.04                   | 0.898      | -1.69               | 3.55                   | 0.870      |
| 4           | -2.79               | 3.02                   | 0.899      | -1.96               | 3.51                   | 0.866      |
| 6           | -3.03               | 3.00                   | 0.900      | -2.21               | 3.49                   | 0.867      |
| 8           | -3.21               | 2.97                   | 0.899      | -2.40               | 3.47                   | 0.868      |
| 10          | -3.34               | 2.98                   | 0.902      | -2.54               | 3.44                   | 0.867      |

**Table S4:** (c) Strain-induced Li/Na adsorption properties of Blue P-MoS<sub>2</sub> heterostructure when Li/Na adsorption takes place on the surface of Blue P. Li adsorption energy ( $E_{ad}$  (Li)), Na adsorption energy ( $E_{ad}$  (Na)), and Bond Lengths between Li-P ( $D_{\text{Li-P}}$ ), Na-P ( $D_{\text{Na-P}}$ ), charge transfer from Li,  $q$  (|e|) Li and charge transfer from Na,  $q$  (|e|) Na.

| % of strain | $E_{ad}$ (Li) in eV | $D_{\text{Li-P}}$ (Å) | q ( e ) Li | $E_{ad}$ (Na) in eV | $D_{\text{Na-P}}$ (Å) | q ( e ) Na |
|-------------|---------------------|-----------------------|------------|---------------------|-----------------------|------------|
| -10         | -2.05               | 3.44                  | 0.896      | -1.10               | 3.70                  | 0.843      |
| -8          | -1.89               | 3.33                  | 0.896      | -1.09               | 3.70                  | 0.843      |
| -6          | -1.79               | 3.25                  | 0.897      | -1.06               | 3.64                  | 0.836      |
| -4          | -1.75               | 3.18                  | 0.895      | -1.03               | 3.61                  | 0.807      |

|    |       |      |       |       |      |       |
|----|-------|------|-------|-------|------|-------|
| -2 | -1.77 | 3.13 | 0.891 | -1.05 | 3.58 | 0.789 |
| 0  | -1.82 | 3.14 | 0.895 | -1.14 | 3.56 | 0.794 |
| 2  | -1.95 | 3.10 | 0.895 | -1.26 | 3.52 | 0.802 |
| 4  | -2.10 | 3.05 | 0.892 | -1.42 | 3.49 | 0.806 |
| 6  | -2.27 | 3.00 | 0.895 | -1.59 | 3.47 | 0.813 |
| 8  | -2.42 | 2.95 | 0.892 | -1.75 | 3.44 | 0.816 |
| 10 | -2.56 | 2.95 | 0.894 | -1.90 | 3.41 | 0.820 |
